# Supplementary material for: Evaluation of strip theory and doublet-lattice aerodynamics
Source: Springer Nature journal article supplement (doi:10.1186/s12864-018-4496-1), 1996-12-03
Supplement: MOESM3 [file 12864_2018_4496_MOESM3_ESM.pdf]

**Instructions for Accessing the miRNA Analysis Pipeline for  
the Genome-scale Measurement Assurance Project of the EDRN**  
(see **Figure S1** for overview)

1. From the EDRN Public Portal navigate to LabCAS login page:
  - a. Select “Informatics” from sidebar
  - b. Select “LabCAS” from Tools list
  - c. Log in

*Opens Manage Workflows page*
2. From the Manage Workflows page (skip to Step 5, to view existing datasets)
  - a. Select “Upload Files”
  - b. Select “NIST Dataset”

*Opens Upload Metadata page*
3. From the Upload Metadata page:
  - a. Confirm “Lab ID”
  - b. Select the “Protocol ID” or select “New Protocol”
    - i. If new, see “Directions for preparing protocol descriptions” and refer to **Figure S2**.
  - c. Select the “Sample ID” or select “New Sample”
    - i. If new, see “Directions for preparing protocol descriptions” and refer to **Figure S3**.
  - d. Enter data collection date

*Opens Ready for Files page*
4. From the Ready for Files page:
  - a. Confirm metadata to be linked to dataset
  - b. Select dataset to be uploaded (refer to **Figure S4** for format):
    - i. *browse* to the correct filename on the participants computer, or
    - ii. *drag* the correct filename onto the webpage
  - c. Select “Start Uploading”
  - d. Select “Finish”

*Generates PDF of dashboard view using default parameters*  
*Returns to Manage Workflows page (step 2)*
5. From Manage Workflows page:
  - a. Select “NIST Product” to view uploaded datasets
  - b. Select a dataset from the collection (*LabID\_ProtocolID\_SampleID*)
  - c. Select file(s) for download:
    - i. (\*.txt)                      text/plain for off-line analysis
    - ii. (\*.pdf)                     application/pdf to view dashboard results

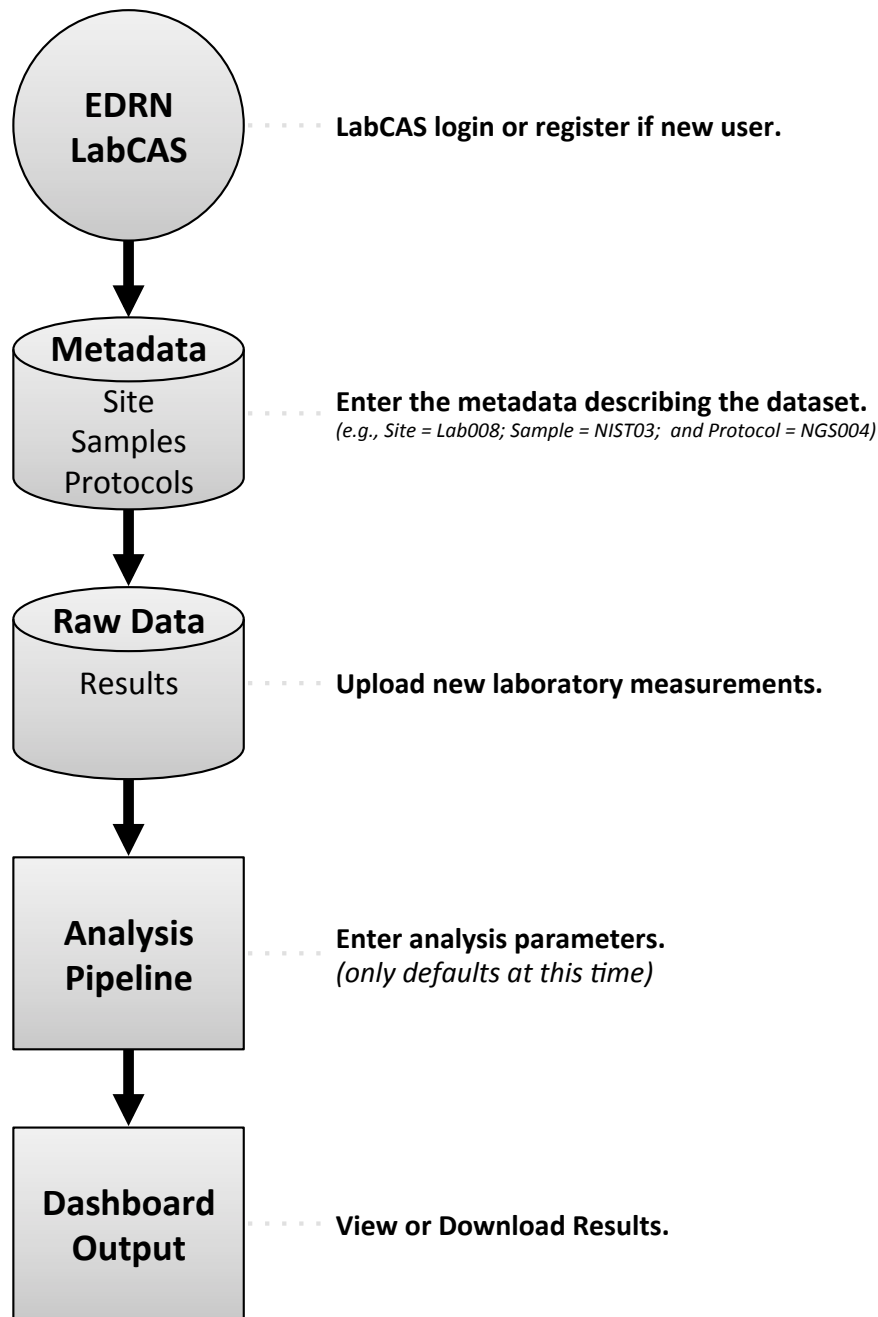

**Figure S1.** Workflow for uploading and analyzing miRNA benchmarking samples using the EDRN Genome-Scale Measurement Assurance portal.

**Directions for preparing protocol descriptions:**

If your laboratory is entering a dataset that was derived from a protocol different from those listed (Step 3b), download the protocol closest to the one used and edit it accordingly (see **Figure S2** for example). If no similar protocol has been described previously, use the template below to prepare a new protocol description.

Protocol Description

1. SiteID: *(replace with LabCAS LabID)*

Technology: ☐ HYB      ☐ NGS      ☐ PCR      ☐ other

If other, describe:

Protocol version: *(use "A" for the first protocol submitted, incrementally letter additional protocols from your site)*

2. Brief protocol or citation to protocol.  
*(limited to < 1,000 characters)*
3. Sample storage conditions.  
*(temperature and duration prior to processing)*
4. Amount of input sample.  
*(ng or  $\mu$ g)*
5. Kits and reagents.  
*(including manufacturer and catalog numbers)*
6. Instrumentation  
*(including manufacturer and model numbers)*
7. Data analysis and preprocessing software  
*(including manufacturer and version)*
8. Note any changes in the methods that occurred between runs

Send new or modified protocols to contact information located at:

<https://edrn.nci.nih.gov/microrna>.

A corresponding ProtocolID will be added to the analysis pipeline.

## Protocol Description

1. **Site ID:** Lab008                      **Technology:** NGS                      **Protocol version:** A
2. **Brief protocol or citation to protocol.**  
New England Biolabs NEBNext Multiplex Small RNA Library Prep Set for Illumina Instruction Manual (using PAGE gel for size selection)
3. **Sample storage conditions (temperature and duration prior to processing).**  
-80 °C, 1 week – 3 months after receipt
4. **Amount of input sample.**  
200 ng
5. **Kits and reagents, including manufacturer and catalog numbers.**  
New England Biolabs - NEBNext Multiplex Small RNA Library Prep Set for Illumina (Set 1), Catalog #E7300S  
New England Biolabs - NEBNext Multiplex Small RNA Library Prep Set for Illumina (Set 2), Catalog # E7580S  
Life Technologies, Inc. - 6% Novex TBE PAGE gel 1.0 mM 10-well, Catalog # EC6265BOX
6. **Instrumentation, including manufacturer and model numbers.**  
Agilent 2100 BioAnalyzer  
Illumina HiSeq 2500
7. **Data analysis and processing software, including manufacturer and version.**  
FASTQ files were trimmed with the fastx\_clipper utility and adapter sequence 5'-AGATCGGAAGAGCACACGTCTGAACTCCAGTCAC-3' using the FASTX toolkit (version 0.0.13.2).  
Trimmed reads  $\geq 15$  bases in length were aligned to human genome build hg19 using Bowtie (v 1.1.1), allowing up to 3 mismatches per alignment and 10 alignments per read.  
Uniquely-aligning reads were used to obtain microRNA-level expression with the 'coverageBed' utility in the BEDtools software suite (version 2.22.1) and a BED file of 2,794 mature microRNA loci from miRBase (version 20).
8. **Note any changes in the methods that occurred between rounds.**  
Sequencing libraries from 9 Round #2 RNA samples were pooled and sequenced in one lane of a High-Output Single-Read flow cell on HiSeq 2500. For Round #3, #4, and #5, each round had 15 RNA samples and sequencing libraries of each round were pooled and sequenced on a Rapid Single-Read flow cell.

**Figure S2.** Example of a protocol description.

**Directions for preparing Sample descriptions:**

*Note: At this time the website only accepts sample sets which use a three component mixture design (see <https://doi.org/10.6028/NIST.SP.1200-23>). Components and mixture proportions may be different from previous sample sets.*

If your laboratory is entering a dataset that was derived from a sample set different from those listed (Step 3c), please use the following template to prepare a new sample set description (see **Figure S3** for example):

**Sample Set Description**

1. Laboratory/institution that prepared the sample set
2. Source of pure total RNA1:
  - a. Tissue of origin
  - b. Supplier
3. Source of pure total RNA2:
  - a. Tissue of origin
  - b. Supplier
4. Source of pure total RNA3:
  - a. Tissue of origin
  - b. Supplier
5. Fraction of each component in Mix1
  - a. RNA1, RNA2, and RNA3
6. Fraction of each component in Mix2
  - a. RNA1, RNA2, and RNA3
7. Aliquot contents
  - a. Volume
  - b. Concentration
8. Key to sample set (see **Figure S3** for example)

Send new or modified protocols to contact information located at:

<https://edrn.nci.nih.gov/microrna>.

A corresponding SampleID will be added to the analysis pipeline.

|                                |          |                                                  |
|--------------------------------|----------|--------------------------------------------------|
| Prepared by (Institution) NIST |          |                                                  |
| Component                      |          |                                                  |
| RNA1                           | Liver    | Thermo Fisher Scientific, Ambion Human Total RNA |
| RNA2                           | Brain    | Thermo Fisher Scientific, Ambion Human Total RNA |
| RNA3                           | Placenta | Thermo Fisher Scientific, Ambion Human Total RNA |
| Mix1 Composition               |          |                                                  |
| RNA1 Fraction                  | 0.25     |                                                  |
| RNA2 Fraction                  | 0.25     |                                                  |
| RNA3 Fraction                  | 0.5      |                                                  |
| Mix2 Composition               |          |                                                  |
| RNA1 Fraction                  | 0.25     |                                                  |
| RNA2 Fraction                  | 0.5      |                                                  |
| RNA3 Fraction                  | 0.25     |                                                  |
| Aliquot                        |          |                                                  |
| Volume (uL)                    | 5        |                                                  |
| Conc. (ug/uL)                  | 1        |                                                  |
| Sample                         | Tissue   | Replicate                                        |
| Sample_1                       | Mix1     | Rep1                                             |
| Sample_2                       | Placenta | Rep1                                             |
| Sample_3                       | Liver    | Rep1                                             |
| Sample_4                       | Mix2     | Rep1                                             |
| Sample_5                       | Placenta | Rep2                                             |
| Sample_6                       | Mix2     | Rep2                                             |
| Sample_7                       | Liver    | Rep2                                             |
| Sample_8                       | Placenta | Rep3                                             |
| Sample_9                       | Brain    | Rep1                                             |
| Sample_10                      | Mix1     | Rep2                                             |
| Sample_11                      | Brain    | Rep2                                             |
| Sample_12                      | Brain    | Rep3                                             |
| Sample_13                      | Mix2     | Rep3                                             |
| Sample_14                      | Mix1     | Rep3                                             |
| Sample_15                      | Liver    | Rep3                                             |

**Figure S3.** Tab-delimited text file with sample description and key.

| Unique identifier column(s) |              |                          | Data column names match sample key |          |          |          |          |     |           |  |
|-----------------------------|--------------|--------------------------|------------------------------------|----------|----------|----------|----------|-----|-----------|--|
| Mature_Name                 | Mature_ID    | Sequence                 | Sample_1                           | Sample_2 | Sample_3 | Sample_4 | Sample_5 | ... | Sample_15 |  |
| let-7a-5p                   | MIMAT0000062 | UGAGGUAGUAGGUUGUAUAGUU   | 308794                             | 218380   | 146529   | 458101   | 203879   |     | 229379    |  |
| let-7b-5p                   | MIMAT0000063 | UGAGGUAGUAGGUUGUGUGGUU   | 38757                              | 11147    | 12472    | 66202    | 10415    |     | 20508     |  |
| let-7c-5p                   | MIMAT0000064 | UGAGGUAGUAGGUUGUAUUGGUU  | 15903                              | 4983     | 9180     | 27483    | 5161     |     | 14650     |  |
| let-7d-5p                   | MIMAT0000065 | AGAGGUAGUAGGUUGCAUAGUU   | 8789                               | 2773     | 4052     | 14097    | 2498     |     | 6331      |  |
| let-7e-5p                   | MIMAT0000066 | UGAGGUAGGAGGUUGUAUAGUU   | 13146                              | 13034    | 1876     | 16716    | 12177    |     | 2628      |  |
| let-7f-5p                   | MIMAT0000067 | UGAGGUAGUAGAUUGUAUAGUU   | 200431                             | 98094    | 175731   | 312584   | 93595    |     | 244964    |  |
| miR-15a-5p                  | MIMAT0000068 | UAGCAGCACUAUAAUGGUUUUGUG | 678                                | 987      | 270      | 564      | 979      |     | 371       |  |
| miR-16-5p                   | MIMAT0000069 | UAGCAGCACGUAAAUAUUGGCG   | 19063                              | 28897    | 6392     | 15462    | 33916    |     | 7691      |  |
| miR-17-5p                   | MIMAT0000070 | CAAAGUGCUUACAGUGCAGGUAG  | 5910                               | 8158     | 5553     | 4226     | 10027    |     | 6334      |  |
| miR-17-3p                   | MIMAT0000071 | ACUGCAGUGAAGGCACUUGUAG   | 166                                | 236      | 263      | 159      | 271      |     | 276       |  |
| miR-18a-5p                  | MIMAT0000072 | UAAGGUGCAUCUAGUGCAGAUAG  | 96                                 | 196      | 50       | 79       | 214      |     | 51        |  |
| miR-19a-3p                  | MIMAT0000073 | UGUGCAAUUCUUGCAAAACUGA   | 664                                | 757      | 802      | 590      | 790      |     | 1139      |  |
| miR-19b-3p                  | MIMAT0000074 | UGUGCAAUCCAUGCAAAACUGA   | 10369                              | 16077    | 8444     | 7520     | 19102    |     | 9784      |  |
| miR-20a-5p                  | MIMAT0000075 | UAAAGUGCUUUAUAGUGCAGGUAG | 9633                               | 12363    | 11631    | 7568     | 14680    |     | 12420     |  |
| miR-21-5p                   | MIMAT0000076 | UAGCUUUAUCAGACUGAUUUUGA  | 494834                             | 761974   | 659397   | 407220   | 992713   |     | 529836    |  |
| miR-22-3p                   | MIMAT0000077 | AAGCUGCCAGUUGAAGAACUGU   | 94294                              | 97890    | 119104   | 92275    | 93042    |     | 156600    |  |
| miR-23a-3p                  | MIMAT0000078 | AUCACAUUGCCAGGGAUUUCC    | 33740                              | 54803    | 5921     | 20889    | 62051    |     | 7177      |  |
| miR-24-1-5p                 | MIMAT0000079 | UGCCUACUGAGCUGAUUUCAGU   | 412                                | 368      |          |          |          |     | 457       |  |
| miR-24-3p                   | MIMAT0000080 | UGGCUCAGUUCAGCAGGAACAG   |                                    |          |          |          |          |     |           |  |
| miR-25-3p                   | MIMAT0000081 | CAUUGCACUUGUGUGUGUGUG    |                                    |          |          |          |          |     |           |  |
| miR-26a-5p                  | MIMAT0000082 | UAGCAGCACUAUAAUGGUUUUGUG |                                    |          |          |          |          |     |           |  |

**Figure S4.** Tab-delimited text file with unique identifier column(s) for intersection with miRBase (<ftp://mirbase.org/pub/mirbase/CURRENT/mature.fa.gz>) and column names that match those in the sample key of the corresponding sample description file (see **Figure S3** for example).
